# Supplementary material for: Molecular mechanics underlying flat-to-round membrane budding in live secretory cells
Source: PubMed Central journal article supplement (PMC9237132; doi:10.1038/s41467-022-31286-4), 2022-06-27
Supplement: 41467_2022_31286_MOESM3_ESM.pdf [file 41467_2022_31286_MOESM3_ESM.pdf]

## Supplementary Video Legends

### Supplementary Movie 1. Actin filament in the act of pulling membrane inward to form $\Lambda$ .

Horizontal length of the image frame is 1.7  $\mu\text{m}$ . The event is the same as the one shown in Figure 1f. Green: PH<sub>G</sub>-labelled plasma membrane; red: Lifeact-labelled F-actin. The video is played at real-time.

### Supplementary Movie 2. Dynamin in the act of constricting $\Lambda$ 's base and $\Omega$ 's pore

Horizontal length of the image frame is 1.7  $\mu\text{m}$ . The event is the same as the one shown in Figure 4c. Green: PH<sub>G</sub>-labelled plasma membrane; red: dynamin 1-mTFP1 puncta. The video is played 2 times as fast as the real-time.

### Supplementary Movie 3. Cryo-electron tomogram of dynamin 1 with DOPS vesicles

3-dimensional views of dynamin 1 assembled around the DOPS vesicle. Data are the same as those shown in Figure 5d.

### Supplementary Movie 4. CryoET segmentation of dynamin 1 around DOPS vesicle

Dynamin 1 (yellow) forms helices around the DOPS vesicle (grey) with a diameter of  $\sim 166$  nm. Data are the same as those shown for Figure 5e, upper row.

### Supplementary Movie 5. Cryo-ET segmentation of dynamin 1 around DOPS vesicle

Dynamin 1 (yellow) forms helices around the DOPS vesicles (grey) with a diameter of  $\sim 85$  nm. Data are the same as those shown for Figure 5e, lower row.

### Supplementary Movie 6. Simulated shape evolution for the Flat $\rightarrow\Lambda\rightarrow\Omega$ transition

Evolution of simulated 3-D shapes for Flat $\rightarrow\Lambda$  (Figure 7c) and  $\Lambda\rightarrow\Omega$  (Figure 7d) transitions combined together, viewed from a different angle. The values of the pulling force,  $f_{pull}$ , and the base radius,  $r_b$ , are shown for each frame. All lengths are scaled by the intrinsic length,  $r_i$ .

Increasing the pulling force,  $f_{pull}$ , while constraining the base to a constant value,  $r_b = 2.5 \cdot r_i$ , results in Flat to  $\Lambda$  transition, which corresponds to the curve shown in (Figure 7c). The shape transformation continues smoothly from  $\Lambda$  to  $\Omega$ -shape by the base constriction upon conservation of the pulling force ( $f_{pull} \cong 7.2 - 7.3 f_i$ ) and membrane area, which corresponds to the curve shown in (Figure 7d).

**Supplementary Movie 7. Flat→ $\Lambda$  transition: the observed versus fitted simulation profiles**

Left: real-time video of the experimentally observed membrane profile evolution (scale bar: 500 nm).

Right: corresponding sequence of model-derived profiles obtained by fitting of the model parameters (see theoretical mathematical modeling). The fitted pulling force,  $f_{pull}$ , is labelled in every video frame.

**Supplementary Movie 8.  $\Lambda$ → $\Omega$  transition: the observed versus fitted simulation profiles**

Left: real-time video of the experimentally observed membrane profile evolution (scale bar: 500 nm).

Right: corresponding sequence of model-derived profiles obtained by fitting of the model parameters (see theoretical mathematical modeling). The fitted base diameter,  $r_b$ , is labelled in every video frame.
